# Supplementary material for: Lossless hybridization between photovoltaic and thermoelectric devices
Source: PubMed Central journal article supplement (PMC3699810; doi:10.1038/srep02123), 2013-07-03
Supplement: srep02123-s1.pdf [file srep02123-s1.pdf]

## Supplementary Information

### Lossless hybridization between photovoltaic and thermoelectric devices

Kwang-Tae Park<sup>1§</sup>, Sun-Mi Shin<sup>1§</sup>, Abdullah S. Tazebay<sup>4</sup>, Han-Don Um<sup>1</sup>, Jin-Young Jung<sup>1</sup>, Sang-Won Jee<sup>4</sup>, Min-Wook Oh<sup>2</sup>, Su-Dong Park<sup>2</sup>, Bongyoung Yoo<sup>3</sup>, Choongho Yu<sup>4\*</sup> and Jung-Ho Lee<sup>1\*</sup>

<sup>1</sup> Department of Chemical Engineering, Hanyang University, Ansan, 426-791, Korea.

<sup>2</sup> Creative Electrotechnology Research Center, Korea Electrotechnology Research Institute (KERI), Changwon, 642-120, Korea.

<sup>3</sup> Department of Materials Engineering, Hanyang University, Ansan, 426-791, Korea.

<sup>4</sup> Department of Mechanical Engineering, Texas A&M University, College Station, Texas 77843, United States.

\*Correspondence and requests for materials should be addressed to J.-H.L. ([jungho@hanyang.ac.kr](mailto:jungho@hanyang.ac.kr)) or C.Y. ([chyu@tamu.edu](mailto:chyu@tamu.edu))

§These authors contributed equally to this work.

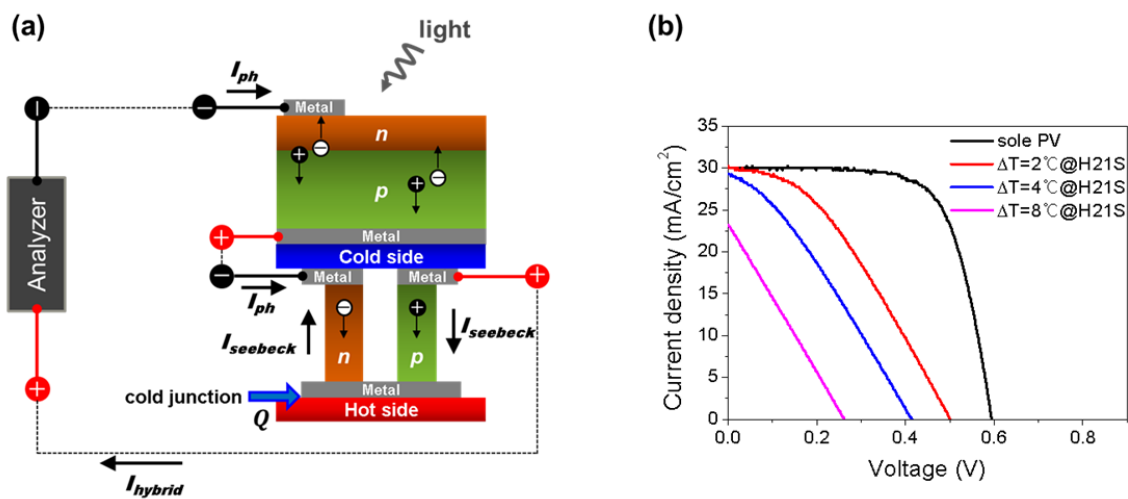

**Fig. S1** (a) Schematic illustration of the hybrid circuit when the contact between PV and TE is switched. (b) The comparison of the light  $J$ - $V$  characteristics of the H21S under  $\Delta T$ . The black solid-curve represents the  $J$ - $V$  characteristic of the sole PV cell. A sign reversion in  $V_{TE}$  on the TE output reduces the  $J_{sc}$  and  $V_{oc}$  of the hybrid circuit.

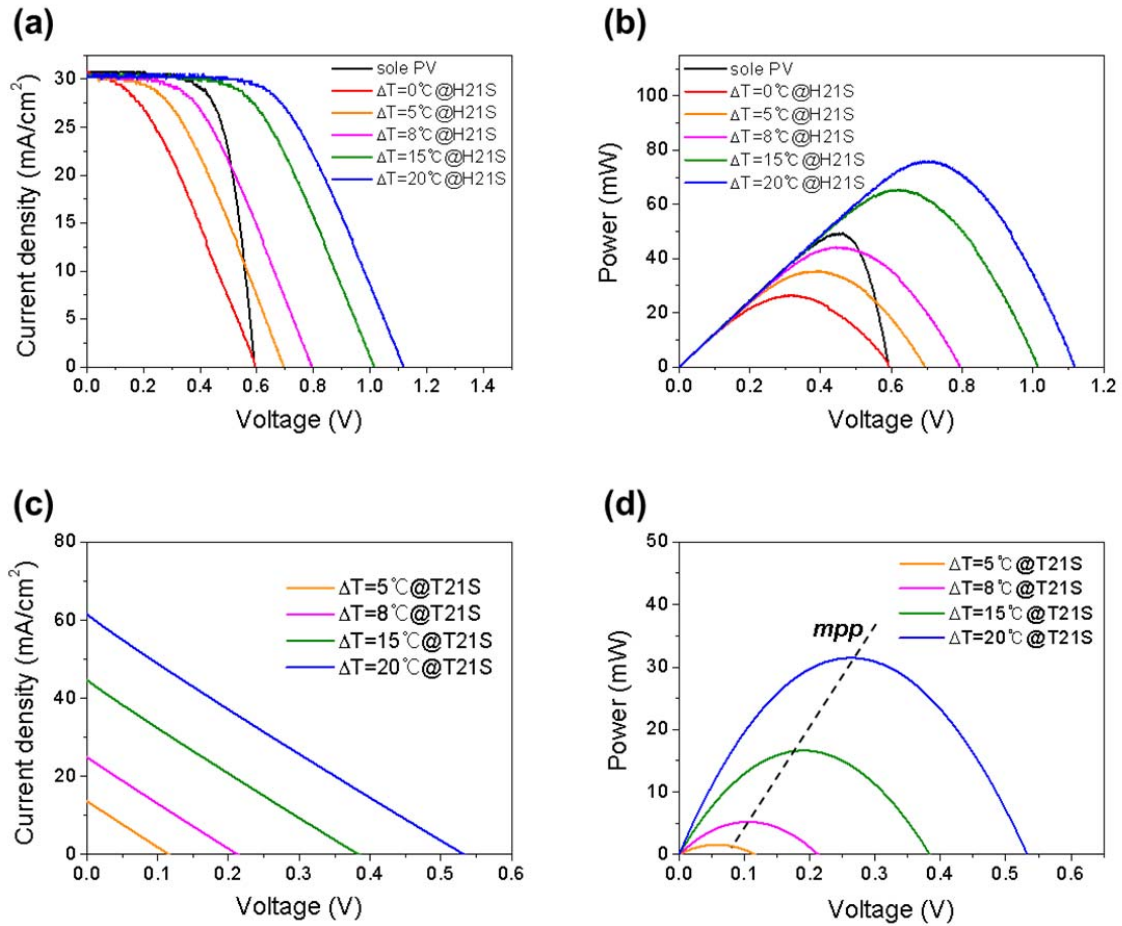

**Fig. S2** (a) The comparison of the light  $J$ - $V$  characteristics of the H21S under various  $\Delta T$ . (b) Output power of the sole PV and H21S as the function of voltage. The output power curve rises with the increase of  $\Delta T$ , and each has its maximum at a specific voltage. (c)  $J$ - $V$  curves of the T21S under various  $\Delta T$ . (d) Output power curves of the T21S as a function of voltage.

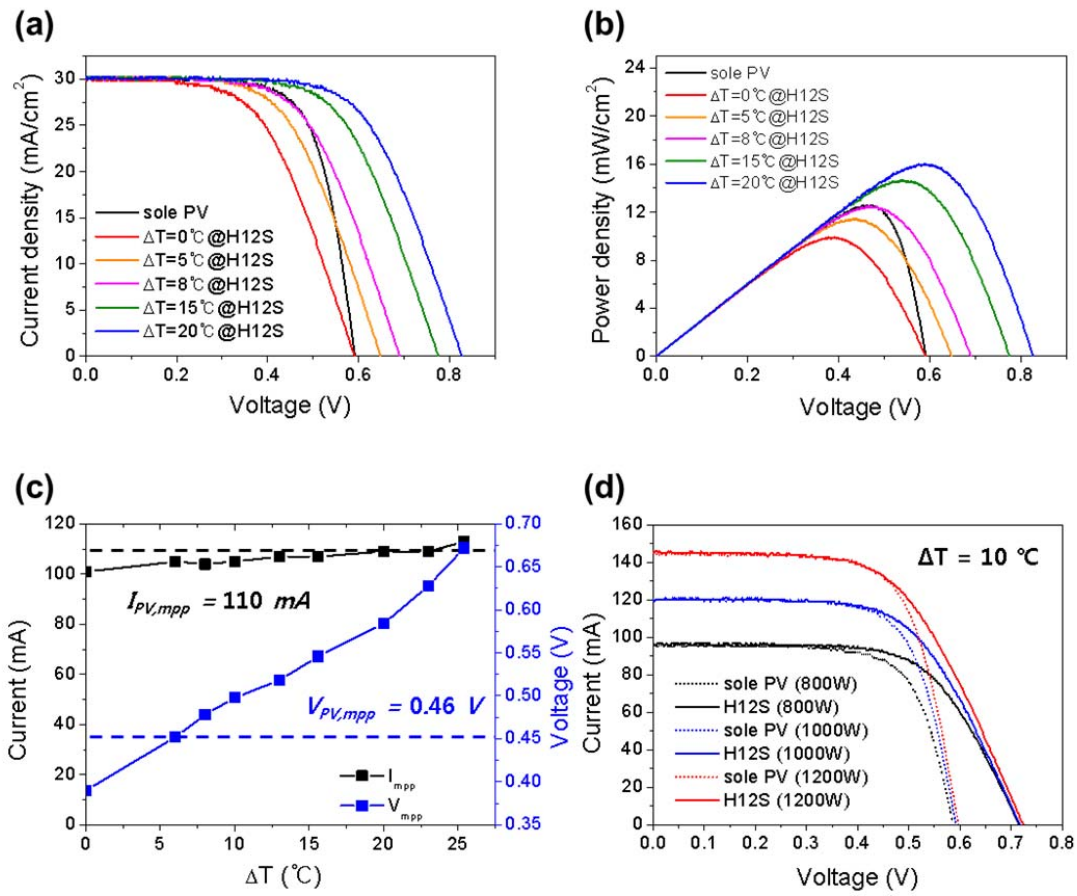

**Fig. S3** (a) The comparison of the light  $J$ - $V$  characteristics of the H12S under various  $\Delta T$ . (b) Output power of the sole PV and H12S as the function of voltage. (c) Dependence of the current at maximum power point  $I_{mpp}$  (black) and the voltage at maximum power point  $V_{mpp}$  (blue) under the various  $\Delta T$ . (d)  $J$ - $V$  characteristics of the sole PV (dotted-line) and the H12S (solid-line) under irradiation of different light intensity. The  $\Delta T$  in H12S is fixed at  $10^\circ\text{C}$ .

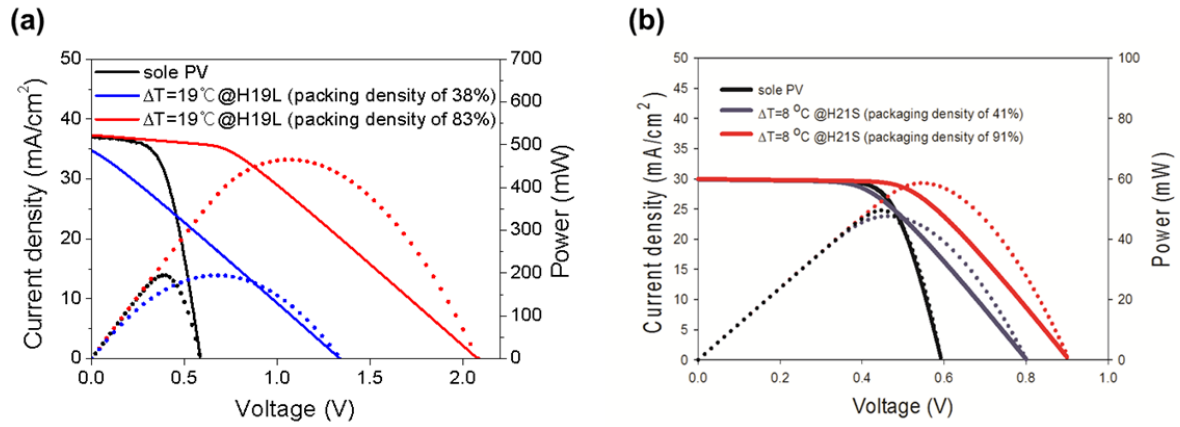

**Fig. S4** Calculated  $J$ - $V$  (solid-line) and  $P$ - $V$  (dotted-line) plots for H19L at  $\Delta T = 19^\circ\text{C}$  (a) and H21S at  $\Delta T = 8^\circ\text{C}$  (b). The red lines are for redesigned H19L whose cross-sectional area and number of each leg are all increased by a factor of 1.5. The improved design increases the packing densities of legs to 83% for T19L and 91% for T21S with the same  $R_i$  ( $1.9\ \Omega$  for T19L and  $2.1\ \Omega$  for T21S).

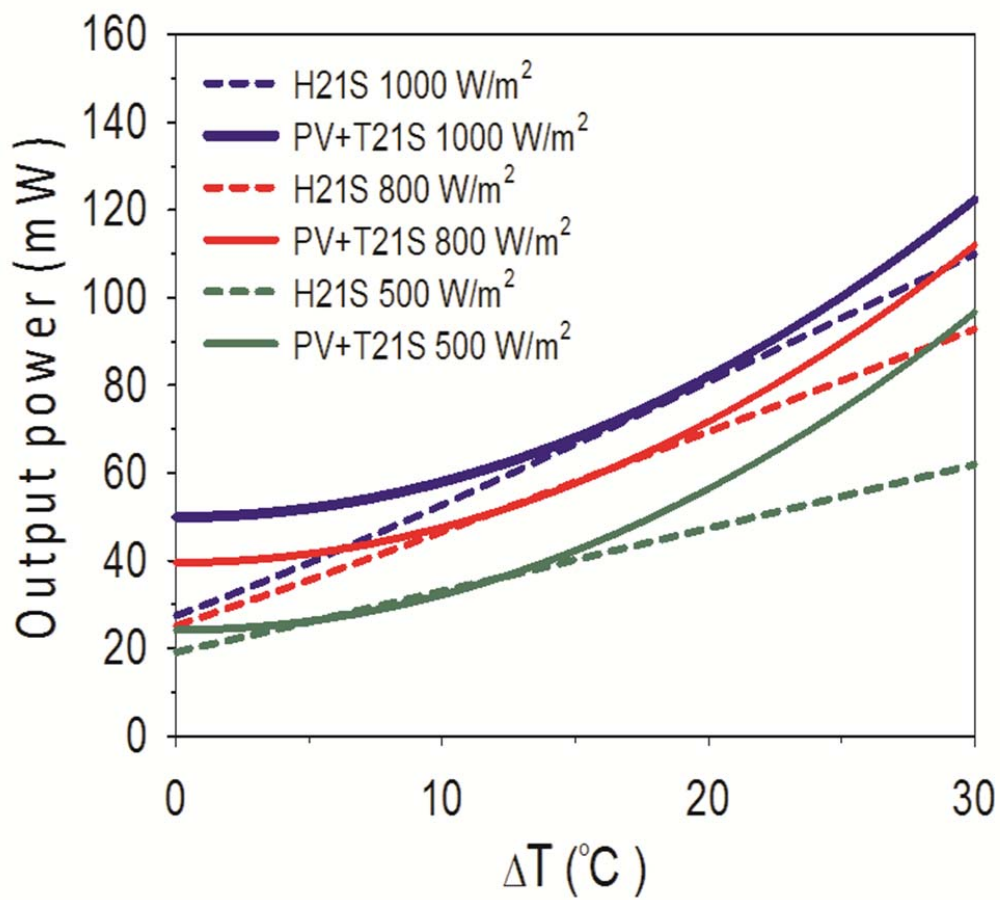

**Fig. S5** Calculated output powers for solar irradiances of 1000, 800, 500 W/m<sup>2</sup>. Solid-lines are for a simple summation of the PV and T21S, and the dotted-lines are for H21S. The variation of incoming solar fluxes emulates the actual solar conditions.
